# Supplementary material
Source: publisher site journal article supplement (https://neobiota.pensoft.net/article/23135/download/suppl/32/)
Supplement: Supplementary file 1

Supplementary Material 2: South African herbarium accession numbers for specimens that were not available online at <http://newposa.sanbi.org> as of 1 March 2018. Most specimens were found, though in several cases the specimen was recorded in Glen (2002) and could not be refound. * indicates taxa present in herbaria but without accession numbers.

| **Species** | **Accession numbers** |
| --- | --- |
| *Acacia acinacea* Lindl. | PRE90009613, PRE 90009612 |
| *Acacia acuaria* W.Fitzg | PRU1230 |
| *Acacia acuminata* Benth. | NBG216002-0, NBG264555-0, SAM00788080 |
| *Acacia alata* R.Br. | SAM0078810 |
| *Acacia aneura* Benth. | PRE899, PRE, JBG |
| *Acacia argyrophylla* Hook. | JBG1842 |
| *Acacia aspera* Lindl. | PRE, PRU1291 |
| *Acacia binervata* DC. | SAM0078823, PRE, JBG |
| *Acacia binervia* (Wendl.) J.F.Macbr. | PRE918735-0, SAM78863 |
| *Acacia brachybotrya* Benth. | PRE, PRU19385 |
| *Acacia brachystachya* Benth. | JBG, PRE, PRU22465 |
| *Acacia calamifolia* Lindl. | SAM0078827, PRE, PRU |
| *Acacia cardiophylla* Benth. | PRE, PRU2063, PRU1592, JBG |
| *Acacia celastrifolia* Benth. | PRU1224 |
| *Acacia cognata* Domin | PRE, PRU1380 |
| *Acacia deanei* (R.T.Baker) M.B.Welch & al. | PRE, PRU, JBG17585 |
| *Acacia decora* Rchb.f. | PRE, PRU0022470, JBG1229 |
| *Acacia dodonaeifolia* (Pers.) Balb. | *PRU |
| *Acacia doratoxylon* A.Cunn. | NBG216085-0, NBG264557-0 |
| *Acacia drummondii* Lindl. | PRU1221 |
| *Acacia elongata* DC. | SAM0078852, JBG16510 |
| *Acacia extensa* Lindl. | JBG849 |
| *Acacia flexifolia* Benth. | *PRE |
| *Acacia flocktoniae* Maiden | *PRE |
| *Acacia floribunda* (Vent.) Willd. | JBG1513, NBG, PRE, PRU |
| *Acacia harpophylla* Benth. | SAM0078865, SAM78867 |
| *Acacia howittii* F.Muell. | Only recorded in Glen (2002), specimen not refound |
| *Acacia iteaphylla* Benth. | PRE, PRU1541,PRU2528, PRU9873 |
| *Acacia ixiophylla* Benth. | *PRE |
| *Acacia jonesii* F.Muell. & Maiden | PRE1528 |
| *Acacia kempeana* F.Muell. | PRU25802, PRU1361 |
| *Acacia koa* A.Gray | Only recorded in Glen (2002), specimen not refound |
| *Acacia lanigera* A.Cunn. | SAM0078876, PRE |
| *Acacia latipes* Benth. | *PRU |
| *Acacia leptoneura* Benth. | PRU1263 |
| *Acacia leptospermoides* Benth. | PRE1222 |
| *Acacia lineolata* Benth. | PRU1226 |
| *Acacia linifolia* (Vent.) Willd. | SAM0078882 |
| *Acacia myrtifolia* (Sm.) Willd. | NBG217415-0, NBG217418-0, SCHG5006-0 |
| *Acacia neriifolia* Benth. | PRE, PRU, NBG, JBG288 |
| *Acacia oxycedrus* Sieber ex DC. | NBG120775-1, NBG120775-2, NBG115734-0, SAM0078902 |
| *Acacia pendula* G.Don. | PRE, PRU, NBG, JBG209, JBG74 |
| *Acacia penninervis* DC. | PRE910735-0, PRE910736-0, PRE910737-0, SAM78905 |
| *Acacia piligera* A.Cunn. | *NBG |
| *Acacia pravissima* F.Muell. | JBG12734 |
| *Acacia prominens* G.Don | SAM0078909, JBG7835 |
| *Acacia provincialis* A.Camus (*Acacia retinodes* Schltdl. misapplied) | SAM0073277, PRE, JBG, NBG |
| *Acacia pruinosa* Benth. | NBG216434-0, NBG264564-0, PRE910835-0, PRE910873-0 |
| *Acacia quornensis* J.M.Black | JBG838 |
| *Acacia richii* A.Gray | PRU25805 |
| *Acacia saliciformis* Tindale | NBG0260433-0 |
| *Acacia salicina* Lindl. | SAM0078924, JBG3082 |
| *Acacia schinoides* Benth. | NBG216729-0, JBG1663 |
| *Acacia scirpifolia* Meissner | NBG217429-1, NBG217429-2 |
| *Acacia squamata* Lindl. | PRU1225 |
| *Acacia subporosa* F.Muell. | PRE910824-0 |
| *Acacia ulicifolia* (Salisb.) Court | PRE910829-0 NBG216215-0, NBG264561-0 |
| *Acacia ulicina* Meissner | SAM0078942, PRU1227 |
| *Acacia uncifera* Benth. | PRU0020620 |
| *Acacia undulifolia* G.Lodd. | NBG264567-0, SAM0078944 |
| *Acacia verniciflua* A.Cunn. | SAM0078946 |
| *Acacia verticillata* (L'Her.) Willd. | *PRE |
| *Acacia willdenowiana* Wendl. | PRU1240 |

Glen, H. F. (2002) *Cultivated plants of Southern Africa.* Southern African National Biodiversity Institute and Jacana, Johannesburg, South Africa, pp420.
